# Supplementary material
Source: PubMed Central journal article supplement (PMC3285305)
Supplement: supp_M111.306159_jbc.M111.306159-1.pdf [file supp_M111.306159_jbc.M111.306159-1.pdf]

## SUPPLEMENTAL FIGURE LEGENDS

Supplemental Table I. Primer sequences for dsRNA region used in transgenic lines

Supplemental Table II. Primer sequences for qPCR to each *pgant*

# Supplemental

Table 1. Primer sequences for generation of IR lines

| gene            | primers                                                                                      | product |
|-----------------|----------------------------------------------------------------------------------------------|---------|
| <i>pgant3</i>   | F: gcgagtgcctagcATGGCTGGAACCACTTCTTT<br>R: gcgagtgcctagcTGACAGCATTATAAAGTACTGC               | 508     |
| <i>pgant4</i>   | F: taatacctaggCAACCTGGATGCCGGAGATCTGACC<br>R: taatacctaggCTCGCAGGAATTGGCCACCACCTTG           | 504     |
| <i>pgant35A</i> | F: taatacctaggACGCGCTGGTGTCCAATAACATAGG<br>R: taatacctaggCTGGGCGTGTACTCAAAGGTATCAG           | 510     |
| <i>CG30463</i>  | F: taatacctaggCCTTCATCTGGCGGCGACGTTTCGACGACGATT<br>R: taatacctaggCTTCCGCATCCTTTCCGCCTGTAGGTC | 349     |
| <i>CG10000</i>  | F: ctagctagcATGCACGCAGGTGGAAAATATTGC<br>R: ctagctagcGCGCTCCTGGTTCCTGAG                       | 557     |

# Supplemental

Table 2. Primer sequences for real-time PCR

| gene            | primers                                                                                      |
|-----------------|----------------------------------------------------------------------------------------------|
| <i>pgant1</i>   | Sense: 5' - GAACCGAGAAGCCACGAATCATAC - 3'<br>Anti-sense: 5' - TCTCCACTCCAATCTGACTCTGC - 3'   |
| <i>pgant2</i>   | Sense: 5' - CGTGCGGCGGAGGTCTG - 3'<br>Anti-sense: 5' - AGGGAATGTTCTTGCGGAGTGG - 3'           |
| <i>pgant3</i>   | Sense: 5' - GGCGATGTGCTGACCTTCCTC - 3'<br>Anti-sense: 5' - ACCTTGCGTGATTCCCTTAATGCG - 3'     |
| <i>pgant4</i>   | Sense: 5' - AGGAGGCGGTGGGTATGTTC - 3'<br>Anti-sense: 5' - ACTGATTCGGTTGCGGATGG - 3'          |
| <i>pgant5</i>   | Sense: 5' - GGAGAAGTCTGCGTCGGAGTC - 3'<br>Anti-sense: 5' - TCTGGCTGTCTGTCTGTGTGTC - 3'       |
| <i>pgant6</i>   | Sense: 5' - ATCTGGATGTGTGGTGGTCAAATG - 3'<br>Anti-sense: 5' - CCTGGGACTCGGCTGATGG - 3'       |
| <i>pgant7</i>   | Sense: 5' - GAGCACACGAAGCACCTGATG - 3'<br>Anti-sense: 5' - CGTATCTCCTTGAACCACCACTG - 3'      |
| <i>pgant8</i>   | Sense: 5' - CAGAATACGCTTCGGGAGTGTTAC - 3'<br>Anti-sense: 5' - TCCAGGCAGAGTTTCGGTGATG - 3'    |
| <i>pgant35A</i> | Sense: 5' - CTCTGTGCCGCCGTGGTG - 3'<br>Anti-sense: 5' - CAATTTCCGCCTTCTCCGTTTCG - 3'         |
| <i>CG10000</i>  | Sense: 5' - TCACACGAGACAGGACACAATGG - 3'<br>Anti-sense: 5' - GCCTAAACAAGCCGCACAATACG - 3'    |
| <i>CG30463</i>  | Sense: 5' - GCGGAGTTAATGTCCGAGGATTC - 3'<br>Anti-sense: 5' - GTTCGGCGGTGCTATTGTGG - 3'       |
| <i>CG31776</i>  | Sense: 5' - AGCGAGAATGGAGGCAATCAGG - 3'<br>Anti-sense: 5' - AATGGGACGGGTGACTATATGTGG - 3'    |
| <i>18s rRNA</i> | Sense: 5' - GGACACGCAAACCTTCTCAACAGC - 3'<br>Anti-sense: 5' - AATCTTCAGAGCCAATCCTTATCCC - 3' |

|               |                                                                                        |
|---------------|----------------------------------------------------------------------------------------|
| <i>pgant5</i> | Sense: 5' - CTTTCTGGGCAAGCAGTTGGAGG - 3'<br>Anti-sense: 5' - GGCACCCAGGAGACGTGC - 3'   |
| <i>RpL37A</i> | Sense: 5' - GCCAAGCGCACCAAGAAGG - 3'<br>Anti-sense: 5' - GCCGCAGAAGGAGCAAGTGTAC - 3'   |
| <i>CG5828</i> | Sense: 5' - CAGCTTGCTGCCGGATCC - 3'<br>Anti-sense: 5' - CGCGGAAGCAGTTGAACCAGTAATC - 3' |
